# Supplementary material for: A series of mononuclear lanthanide complexes featuring 3-D supramolecular networks: synthesis, characterization and luminescent properties for sensing guest molecules
Source: Royal Society of Chemistry journal article supplement (doi:10.1039/c3pp50346a), 2014-01-07
Supplement: c3pp50346a.pdf [file c3pp50346a.pdf]

## Supporting information

### A series of mononuclear lanthanide complexes featuring 3-D supramolecular networks: Synthesis, characterization and luminescent properties for sensing guest molecules

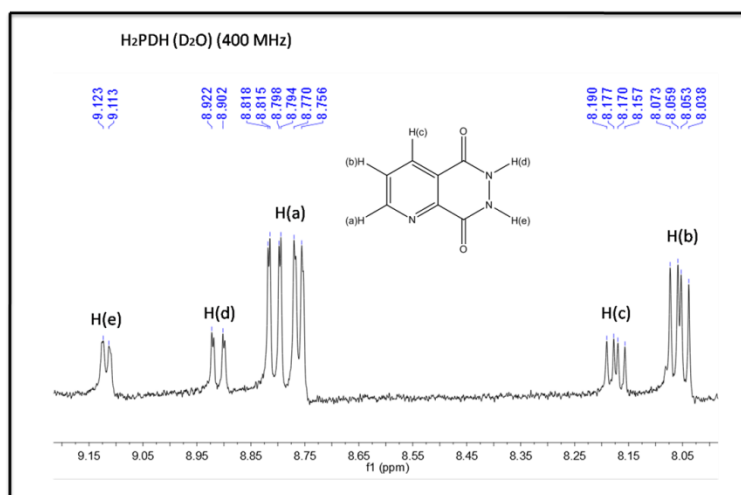

**Figure S1.** <sup>1</sup>H NMR spectrum of 6,7-dihydropyrido(2,3-d)pyridazine-5,8-dione at 400 MHz by using D<sub>2</sub>O as solvent.

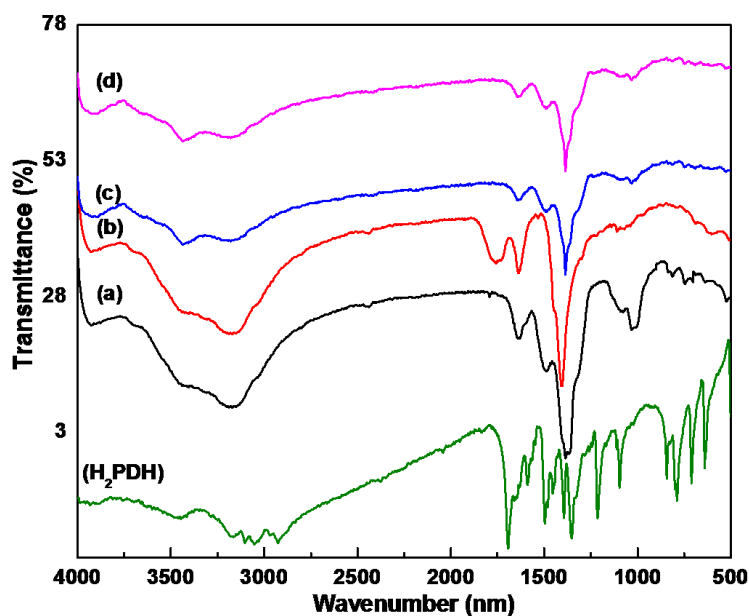

**Figure S2.** Infrared (IR) spectra of ligand H<sub>2</sub>PDH and complexes **1** (a), **2** (b), **3** (c) and **4** (d).



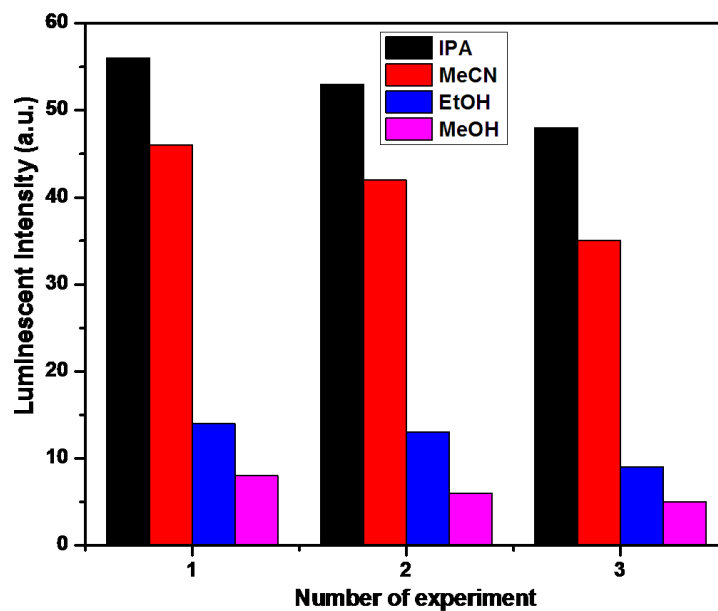

**Figure S5.** Reusability of the complex **3a** in IPA, MeCN, EtOH and MeOH by filtering off the dispersed solution after use, washing several times with H<sub>2</sub>O/EtOH and drying under vacuum at 423 K for 5 h, when excited at 270 nm.

## Tables

**Table S1** Crystal data and structure refinement of complex **1** and complex **3**.

|                                                               | Complex <b>1</b>                                                  | Complex <b>3</b>                                                  |
|---------------------------------------------------------------|-------------------------------------------------------------------|-------------------------------------------------------------------|
| Formula                                                       | C <sub>21</sub> H <sub>20</sub> N <sub>9</sub> O <sub>10</sub> Sm | C <sub>21</sub> H <sub>20</sub> N <sub>9</sub> O <sub>10</sub> Tb |
| <i>F</i> <sub>w</sub>                                         | 708.81                                                            | 717.38                                                            |
| Crystal system                                                | Monoclinic                                                        | Monoclinic                                                        |
| space group                                                   | <i>P</i> 2 <sub>1</sub> / <i>c</i>                                | <i>P</i> 2 <sub>1</sub> / <i>c</i>                                |
| <i>a</i> (Å)                                                  | 6.0157(7)                                                         | 5.9758(2)                                                         |
| <i>b</i> (Å)                                                  | 21.542(4)                                                         | 21.4942(13)                                                       |
| <i>c</i> (Å)                                                  | 18.412(3)                                                         | 18.3468(12)                                                       |
| <i>α</i> (°)                                                  | 90.00                                                             | 90.00                                                             |
| <i>β</i> (°)                                                  | 92.247(13)                                                        | 91.887(4)                                                         |
| <i>γ</i> (°)                                                  | 90.00                                                             | 90.00                                                             |
| <i>V</i> , Å <sup>3</sup>                                     | 2384.2(6)                                                         | 2355.3(2)                                                         |
| <i>Z</i>                                                      | 4                                                                 | 4                                                                 |
| $\rho_{\text{calcd}}$ , mg/m <sup>3</sup>                     | 1.975                                                             | 2.023                                                             |
| Temp, K                                                       | 101.8                                                             | 98.6                                                              |
| <i>F</i> (000)                                                | 1404                                                              | 1416                                                              |
| $\mu$ , mm <sup>-1</sup>                                      | 2.543                                                             | 3.083                                                             |
| Reflections collected / unique                                | 10193                                                             | 9489                                                              |
| <i>R</i> (int)                                                | 0.0595                                                            | 0.0548                                                            |
| <i>R</i> 1, <i>wR</i> 2 [ <i>I</i> > 2 $\sigma$ ( <i>I</i> )] | 0.0487, 0.0834                                                    | 0.0454, 0.0862                                                    |
| <i>R</i> 1, <i>wR</i> 2 (all data)                            | 0.0744, 0.0932                                                    | 0.0646, 0.0953                                                    |
| GOF                                                           | 1.033                                                             | 1.044                                                             |
| Largest diff. peak and hole (e·Å <sup>-3</sup> )              | 1.820 and -0.706                                                  | 1.971 and -0.745                                                  |
| CCDC numbers                                                  | 960629                                                            | 960631                                                            |

**Table S2** Selected bond lengths [Å] and angles [°] for complex **1**.

| Complex <b>1</b> |           |                   |           |
|------------------|-----------|-------------------|-----------|
| Bond lengths     |           |                   |           |
| Sm(1)-O(1)       | 2.351(2)  | Sm(1)-O(5)        | 2.404(3)  |
| Sm(1)-O(3)       | 2.385(3)  | Sm(1)-OW(8)       | 2.454(4)  |
| Sm(1)-OW(7)      | 2.401(3)  | Sm(1)-OW(9)       | 2.568(3)  |
| Sm(1)-N(1)       | 2.695(3)  | Sm(1)-N(4)        | 2.741(5)  |
| Sm(1)-N(7)       | 2.634(3)  |                   |           |
| Bond angles      |           |                   |           |
| O(1)-Sm(1)-N(1)  | 64.59(4)  | O(1)-Sm(1)-O(3)   | 76.18(4)  |
| O(1)-Sm(1)-OW(7) | 136.32(3) | O(3)-Sm(1)-N(1)   | 67.85(4)  |
| O(1)-Sm(1)-N(4)  | 132.43(5) | OW(7)-Sm(1)-N(4)  | 70.68(4)  |
| O(1)-Sm(1)-OW(9) | 79.24(4)  | OW(7)-Sm(1)-OW(9) | 139.26(3) |
| O(1)-Sm(1)-O(5)  | 136.76(4) | OW(7)-Sm(1)-O(5)  | 77.21(4)  |
| O(1)-Sm(1)-N(7)  | 71.76(4)  | OW(7)-Sm(1)-N(7)  | 132.38(4) |
| O(1)-Sm(1)-OW(8) | 81.61(4)  | OW(7)-Sm(1)-OW(8) | 78.59(4)  |
| N(1)-Sm(1)-O(3)  | 67.85(4)  | OW(7)-Sm(1)-N(1)  | 71.93(3)  |
| N(1)-Sm(1)-OW(7) | 71.93(3)  | N(4)-Sm(1)-OW(9)  | 69.32(4)  |
| N(1)-Sm(1)-N(4)  | 115.33(6) | N(4)-Sm(1)-O(5)   | 76.97(4)  |
| N(1)-Sm(1)-OW(9) | 133.90(5) | N(4)-Sm(1)-N(7)   | 123.42(6) |
| N(1)-Sm(1)-O(5)  | 139.42(5) | N(4)-Sm(1)-OW(8)  | 145.16(4) |
| N(1)-Sm(1)-N(7)  | 120.90(5) | OW(9)-Sm(1)-O(5)  | 86.58(3)  |
| N(1)-Sm(1)-OW(8) | 68.07(4)  | OW(9)-Sm(1)-N(7)  | 68.11(4)  |
| O(3)-Sm(1)-OW(7) | 91.74(3)  | OW(9)-Sm(1)-OW(8) | 135.57(4) |
| O(3)-Sm(1)-N(4)  | 62.73(4)  | O(5)-Sm(1)-N(7)   | 65.04(4)  |
| O(3)-Sm(1)-OW(9) | 76.79(4)  | O(5)-Sm(1)-OW(8)  | 80.62(5)  |
| O(3)-Sm(1)-O(5)  | 139.57(5) | N(7)-Sm-OW(8)     | 67.89(4)  |
| O(3)-Sm(1)-OW(8) | 135.72(5) |                   |           |

**Table S3** Hydrogen bonds [Å] and angles [°] found in complex **1**

| D-H...A                                                                          | D-H (Å)   | H...A (Å) | D...A (Å) | D...H...A (°) |
|----------------------------------------------------------------------------------|-----------|-----------|-----------|---------------|
| Inter-molecular hydrogen Bonding interaction within 1D chain                     |           |           |           |               |
| OW8-H8b...O4                                                                     | 0.8464(1) | 1.8965(2) | 2.7078(3) | 160.131(15)   |
| Hydrogen bonding interaction between 1D chains and uncoordinated water molecules |           |           |           |               |
| OW9-<br>H9a...OW10                                                               | 0.8507(1) | 2.2370(3) | 3.0124(4) | 151.575(13)   |
| Hydrogen bonding interaction between adjacent 2D layers                          |           |           |           |               |
| N6-H6...O6                                                                       | 0.8600(1) | 2.0693(3) | 2.8536(4) | 151.285(5)    |
| O7-H7b...O3                                                                      | 0.8522(1) | 2.6016(3) | 2.9587(3) | 106.499(6)    |
| N9-H9...N5                                                                       | 0.8601(1) | 2.1029(3) | 2.9369(4) | 163.237(9)    |
| O7-H7a...N5                                                                      | 0.8473(1) | 2.2190(3) | 3.0550(4) | 168.995(12)   |
| O7-H7a...O3                                                                      | 0.8473(1) | 2.5136(3) | 2.9587(3) | 113.777(7)    |
| O9-H9b...O5                                                                      | 0.8436(1) | 2.1637(3) | 2.9779(3) | 162.140(7)    |
| O9-H9b...O7                                                                      | 0.8436(1) | 2.6372(3) | 3.1301(4) | 118.617(8)    |
